# Supplementary material
Source: publisher figshare collection journal article supplement (https://acs.figshare.com/ndownloader/files/5692077)
Supplement: Supplementary file 1 [file 5692077]

# ic0108078.cif

# SUBMISSION DETAILS


_publ_requested_journal               ' Inorganic Chemistry'


_publ_requested_category            ' FM'


_publ_contact_author_name           ' Prof. James P. Collman'


_publ_contact_author_address

;

      Department of Chemistry

Stanford University

Stanford, CA 94305-5080

;

_publ_contact_letter

;

      ENTER TEXT OF LETTER

;


_publ_requested_coeditor_name          ?

_publ_contact_author_phone            ' 650 - 7250283 '

_publ_contact_author_fax              ' 650-7250259 '

_publ_contact_author_email            ' jpc@stanford.edu '


#==============================================================================


# PROCESSING SUMMARY (IUCr Office Use Only)


_journal_date_recd_electronic     ?

_journal_date_to_coeditor         ?

_journal_date_from_coeditor       ?

_journal_date_accepted            ?

_journal_date_printers_first      ?

_journal_date_printers_final      ?

_journal_date_proofs_out          ?

_journal_date_proofs_in           ?

_journal_coeditor_name            ?

_journal_coeditor_code            ?

_journal_coeditor_notes

; ?

;

_journal_techeditor_code          ?

_journal_techeditor_notes

; ?

;

_journal_coden_ASTM               ?

_journal_name_full                ?

_journal_year                     ?

_journal_volume                   ?

_journal_issue                    ?

_journal_page_first               ?

_journal_page_last                ?

_journal_suppl_publ_number        ?

_journal_suppl_publ_pages         ?


#==============================================================================


# TITLE AND AUTHOR LIST


_publ_section_title

;

High-vacuum pyrolysis of
Zr(2,3,7,8,12,13,17,18-octaethylporphyrin)(PhC(CPh) as a route to
novel Zr species: X-ray structure of a hetero-triply bridged species,
[(OEP)Zr(?-Cl)]2(?-O).

;


_publ_section_title_footnote

;

      ENTER ANY FOOTNOTES TO TITLE

;

loop_

_publ_author_name

_publ_author_footnote

_publ_author_address

' James P. Collman '

;

    FIRST AUTHORS FOOTNOTES

;

;

    Dep. of Chemistry

Stanford University

Stanford, CA 9430-5080

;


#==============================================================================


data_rb6


_audit_creation_method            SHELXL-97

_chemical_name_systematic

;

   ?

;

_chemical_name_common             ?

_chemical_melting_point           ?

_chemical_formula_moiety          ?

_chemical_formula_sum

   'C72 H88 Cl2 N8 O Zr2'

_chemical_formula_weight          1334.84


loop_

   _atom_type_symbol

   _atom_type_description

   _atom_type_scat_dispersion_real

   _atom_type_scat_dispersion_imag

   _atom_type_scat_source

   'C'  'C'   0.0033   0.0016

   'International Tables Vol C Tables 4.2.6.8 and 6.1.1.4'

   'H'  'H'   0.0000   0.0000

   'International Tables Vol C Tables 4.2.6.8 and 6.1.1.4'

   'N'  'N'   0.0061   0.0033

   'International Tables Vol C Tables 4.2.6.8 and 6.1.1.4'

   'Zr'  'Zr'  -2.9673   0.5597

   'International Tables Vol C Tables 4.2.6.8 and 6.1.1.4'

   'Cl'  'Cl'   0.1484   0.1585

   'International Tables Vol C Tables 4.2.6.8 and 6.1.1.4'

   'O'  'O'   0.0106   0.0060

   'International Tables Vol C Tables 4.2.6.8 and 6.1.1.4'


_symmetry_cell_setting            ?

_symmetry_space_group_name_H-M    ?


loop_

   _symmetry_equiv_pos_as_xyz

   'x, y, z'

   '-x, y+1/2, -z+1/2'

   '-x, -y, -z'

   'x, -y-1/2, z-1/2'


_cell_length_a                    18.836(4)

_cell_length_b                    15.084(4)

_cell_length_c                    23.170(5)

_cell_angle_alpha                 90.00

_cell_angle_beta                  100.016(5)

_cell_angle_gamma                 90.00

_cell_volume                      6483(3)

_cell_formula_units_Z             4

_cell_measurement_temperature     177

_cell_measurement_reflns_used      1261

_cell_measurement_theta_min       3.65

_cell_measurement_theta_max       39.6


_exptl_crystal_description        thin plate

_exptl_crystal_colour             red

_exptl_crystal_size_max           0.26

_exptl_crystal_size_mid           0.26

_exptl_crystal_size_min           .007

_exptl_crystal_density_meas       ?

_exptl_crystal_density_diffrn     1.368

_exptl_crystal_density_method     'not measured'

_exptl_crystal_F_000              2792

_exptl_absorpt_coefficient_mu     0.455

_exptl_absorpt_correction_type    ?

_exptl_absorpt_correction_T_min   ?

_exptl_absorpt_correction_T_max   ?

_exptl_absorpt_process_details    ?


_exptl_special_details

;

   ?

;


_diffrn_ambient_temperature       293(2)

_diffrn_radiation_wavelength      0.71073

_diffrn_radiation_type            MoK\a

_diffrn_radiation_source          'fine-focus sealed tube'

_diffrn_radiation_monochromator   graphite

_diffrn_measurement_device_type   CCD

_diffrn_measurement_method        ?

_diffrn_detector_area_resol_mean  ?

_diffrn_standards_number          ?

_diffrn_standards_interval_count  ?

_diffrn_standards_interval_time   ?

_diffrn_standards_decay_%         ?

_diffrn_reflns_number             5846

_diffrn_reflns_av_R_equivalents   0.0000

_diffrn_reflns_av_sigmaI/netI     0.2939

_diffrn_reflns_limit_h_min        0

_diffrn_reflns_limit_h_max        17

_diffrn_reflns_limit_k_min        -14

_diffrn_reflns_limit_k_max        14

_diffrn_reflns_limit_l_min        -22

_diffrn_reflns_limit_l_max        21

_diffrn_reflns_theta_min          1.62

_diffrn_reflns_theta_max          19.78

_reflns_number_total              5846

_reflns_number_gt                 2434

_reflns_threshold_expression      >2sigma(I)


_computing_data_collection        ?

_computing_cell_refinement        ?

_computing_data_reduction         ?

_computing_structure_solution     'SHELXS-97 (Sheldrick, 1990)'

_computing_structure_refinement   'SHELXL-97 (Sheldrick, 1997)'

_computing_molecular_graphics     ?

_computing_publication_material   ?


_refine_special_details

;

   Refinement of F^2^ against ALL reflections.  The weighted R-factor wR and

   goodness of fit S are based on F^2^, conventional R-factors R are based

   on F, with F set to zero for negative F^2^. The threshold expression of

   F^2^ > 2sigma(F^2^) is used only for calculating R-factors(gt) etc. and is

   not relevant to the choice of reflections for refinement.  R-factors based

   on F^2^ are statistically about twice as large as those based on F, and R-

   factors based on ALL data will be even larger.

;


_refine_ls_structure_factor_coef  Fsqd

_refine_ls_matrix_type            full

_refine_ls_weighting_scheme       calc

_refine_ls_weighting_details

   'calc w=1/[\s^2^(Fo^2^)+(0.0576P)^2^+0.0000P] where P=(Fo^2^+2Fc^2^)/3'

_atom_sites_solution_primary      direct

_atom_sites_solution_secondary    difmap

_atom_sites_solution_hydrogens    geom

_refine_ls_hydrogen_treatment     mixed

_refine_ls_extinction_method      none

_refine_ls_extinction_coef        ?

_refine_ls_number_reflns          5846

_refine_ls_number_parameters      763

_refine_ls_number_restraints      696

_refine_ls_R_factor_all           0.1474

_refine_ls_R_factor_gt            0.0621

_refine_ls_wR_factor_ref          0.1593

_refine_ls_wR_factor_gt           0.1382

_refine_ls_goodness_of_fit_ref    0.712

_refine_ls_restrained_S_all       0.692

_refine_ls_shift/su_max           0.083

_refine_ls_shift/su_mean          0.003


loop_

   _atom_site_label

   _atom_site_type_symbol

   _atom_site_fract_x

   _atom_site_fract_y

   _atom_site_fract_z

   _atom_site_U_iso_or_equiv

   _atom_site_adp_type

   _atom_site_occupancy

   _atom_site_symetry_multiplicity

   _atom_site_calc_flag

   _atom_site_refinement_flags

   _atom_site_disorder_assembly

   _atom_site_disorder_group

Zr1 Zr 0.63456(7) 0.55061(8) 0.71652(5) 0.0281(4) Uani 1 1 d . . .

Zr2 Zr 0.80099(7) 0.51335(8) 0.69361(5) 0.0286(4) Uani 1 1 d . . .

Cl1 Cl 0.6829(2) 0.4391(3) 0.63626(18) 0.0760(14) Uani 1 1 d . . .

Cl2 Cl 0.7050(2) 0.6380(3) 0.64223(18) 0.0790(14) Uani 1 1 d . . .

O O 0.7341(5) 0.5300(8) 0.7448(4) 0.093(4) Uani 1 1 d . . .

N1A N 0.5372(5) 0.5553(7) 0.6439(4) 0.030(2) Uani 1 1 d U . .

N2A N 0.5959(5) 0.6912(6) 0.7253(4) 0.027(2) Uani 1 1 d U . .

N3A N 0.6317(5) 0.5593(6) 0.8134(4) 0.027(2) Uani 1 1 d U . .

N4A N 0.5777(5) 0.4238(6) 0.7319(4) 0.029(2) Uani 1 1 d U . .

C1A C 0.5007(6) 0.4851(8) 0.6140(5) 0.030(3) Uani 1 1 d U . .

C2A C 0.4551(6) 0.5123(8) 0.5604(5) 0.029(3) Uani 1 1 d U . .

C3A C 0.4625(6) 0.6032(8) 0.5585(5) 0.033(3) Uani 1 1 d U . .

C4A C 0.5135(6) 0.6288(8) 0.6095(5) 0.028(3) Uani 1 1 d U . .

C5A C 0.5338(6) 0.7146(8) 0.6259(5) 0.030(3) Uani 1 1 d U . .

H5AA H 0.5208 0.7578 0.5974 0.036 Uiso 1 1 calc R . .

C6A C 0.5703(6) 0.7440(8) 0.6784(5) 0.030(3) Uani 1 1 d U . .

C7A C 0.5842(6) 0.8374(8) 0.6950(5) 0.030(3) Uani 1 1 d U . .

C8A C 0.6180(6) 0.8381(8) 0.7507(5) 0.032(3) Uani 1 1 d U . .

C9A C 0.6234(6) 0.7465(8) 0.7711(5) 0.028(3) Uani 1 1 d U . .

C10A C 0.6475(6) 0.7218(8) 0.8272(5) 0.031(3) Uani 1 1 d U . .

H10A H 0.6654 0.7662 0.8536 0.037 Uiso 1 1 calc R . .

C11A C 0.6480(6) 0.6334(9) 0.8493(5) 0.033(3) Uani 1 1 d U . .

C12A C 0.6675(6) 0.6081(9) 0.9096(5) 0.032(3) Uani 1 1 d U . .

C13A C 0.6604(6) 0.5187(8) 0.9123(5) 0.033(3) Uani 1 1 d U . .

C14A C 0.6389(6) 0.4894(8) 0.8519(5) 0.027(3) Uani 1 1 d U . .

C15A C 0.6303(6) 0.4019(8) 0.8347(5) 0.027(3) Uani 1 1 d U . .

H15A H 0.6450 0.3598 0.8636 0.033 Uiso 1 1 calc R . .

C16A C 0.6032(6) 0.3702(8) 0.7812(5) 0.027(3) Uani 1 1 d U . .

C17A C 0.5897(6) 0.2780(8) 0.7628(5) 0.030(3) Uani 1 1 d U . .

C18A C 0.5544(6) 0.2770(8) 0.7072(5) 0.032(3) Uani 1 1 d U . .

C19A C 0.5450(6) 0.3698(8) 0.6869(5) 0.025(3) Uani 1 1 d U . .

C20A C 0.5097(6) 0.3982(8) 0.6347(5) 0.029(3) Uani 1 1 d U . .

H20A H 0.4885 0.3543 0.6092 0.035 Uiso 1 1 calc R . .

C21A C 0.4083(6) 0.4545(8) 0.5183(5) 0.033(3) Uani 1 1 d U . .

H21A H 0.4339 0.3999 0.5136 0.039 Uiso 1 1 calc R . .

H21B H 0.3987 0.4838 0.4805 0.039 Uiso 1 1 calc R . .

C22A C 0.3377(6) 0.4322(8) 0.5367(5) 0.049(4) Uani 1 1 d U . .

H22A H 0.3098 0.3953 0.5075 0.074 Uiso 1 1 calc R . .

H22B H 0.3117 0.4859 0.5409 0.074 Uiso 1 1 calc R . .

H22C H 0.3467 0.4013 0.5734 0.074 Uiso 1 1 calc R . .

C23A C 0.4265(6) 0.6631(8) 0.5098(5) 0.036(3) Uani 1 1 d U . .

H23A H 0.4564 0.7151 0.5081 0.043 Uiso 1 1 calc R . .

H23B H 0.4231 0.6321 0.4727 0.043 Uiso 1 1 calc R . .

C24A C 0.3533(6) 0.6920(8) 0.5171(5) 0.043(4) Uani 1 1 d U . .

H24A H 0.3334 0.7301 0.4852 0.065 Uiso 1 1 calc R . .

H24B H 0.3563 0.7236 0.5534 0.065 Uiso 1 1 calc R . .

H24C H 0.3229 0.6410 0.5175 0.065 Uiso 1 1 calc R . .

C25A C 0.5686(7) 0.9164(8) 0.6535(5) 0.043(3) Uani 1 1 d U . .

H25A H 0.5277 0.9030 0.6231 0.051 Uiso 1 1 calc R . .

H25B H 0.5563 0.9677 0.6751 0.051 Uiso 1 1 calc R . .

C26A C 0.6336(7) 0.9371(9) 0.6260(6) 0.063(4) Uani 1 1 d U . .

H26A H 0.6233 0.9870 0.6002 0.094 Uiso 1 1 calc R . .

H26B H 0.6451 0.8866 0.6041 0.094 Uiso 1 1 calc R . .

H26C H 0.6739 0.9508 0.6562 0.094 Uiso 1 1 calc R . .

C27A C 0.6477(6) 0.9176(8) 0.7872(5) 0.035(3) Uani 1 1 d U . .

H27A H 0.6268 0.9712 0.7683 0.042 Uiso 1 1 calc R . .

H27B H 0.6333 0.9137 0.8253 0.042 Uiso 1 1 calc R . .

C28A C 0.7267(6) 0.9241(8) 0.7953(5) 0.052(4) Uani 1 1 d U . .

H28A H 0.7425 0.9756 0.8183 0.078 Uiso 1 1 calc R . .

H28B H 0.7414 0.9287 0.7577 0.078 Uiso 1 1 calc R . .

H28C H 0.7479 0.8721 0.8152 0.078 Uiso 1 1 calc R . .

C29A C 0.6818(6) 0.6725(8) 0.9615(5) 0.029(3) Uani 1 1 d U . .

H29A H 0.7141 0.6445 0.9935 0.035 Uiso 1 1 calc R . .

H29B H 0.7058 0.7247 0.9499 0.035 Uiso 1 1 calc R . .

C30A C 0.6139(6) 0.7008(8) 0.9833(5) 0.043(4) Uani 1 1 d U . .

H30A H 0.6263 0.7408 1.0157 0.064 Uiso 1 1 calc R . .

H30B H 0.5904 0.6496 0.9957 0.064 Uiso 1 1 calc R . .

H30C H 0.5821 0.7300 0.9522 0.064 Uiso 1 1 calc R . .

C31A C 0.6683(6) 0.4594(8) 0.9645(5) 0.038(3) Uani 1 1 d U . .

H31A H 0.6960 0.4900 0.9978 0.046 Uiso 1 1 calc R . .

H31B H 0.6952 0.4070 0.9570 0.046 Uiso 1 1 calc R . .

C32A C 0.5961(6) 0.4306(9) 0.9800(5) 0.056(4) Uani 1 1 d U . .

H32A H 0.6045 0.3930 1.0139 0.084 Uiso 1 1 calc R . .

H32B H 0.5689 0.3988 0.9477 0.084 Uiso 1 1 calc R . .

H32C H 0.5696 0.4821 0.9883 0.084 Uiso 1 1 calc R . .

C33A C 0.6128(6) 0.2003(8) 0.8026(5) 0.035(3) Uani 1 1 d U . .

H33A H 0.6066 0.2152 0.8421 0.041 Uiso 1 1 calc R . .

H33B H 0.5821 0.1499 0.7898 0.041 Uiso 1 1 calc R . .

C34A C 0.6875(6) 0.1760(8) 0.8029(5) 0.048(4) Uani 1 1 d U . .

H34A H 0.7004 0.1274 0.8294 0.072 Uiso 1 1 calc R . .

H34B H 0.7180 0.2258 0.8153 0.072 Uiso 1 1 calc R . .

H34C H 0.6933 0.1586 0.7641 0.072 Uiso 1 1 calc R . .

C35A C 0.5332(6) 0.1984(8) 0.6674(5) 0.034(3) Uani 1 1 d U . .

H35A H 0.5247 0.1473 0.6907 0.041 Uiso 1 1 calc R . .

H35B H 0.4889 0.2116 0.6407 0.041 Uiso 1 1 calc R . .

C36A C 0.5910(7) 0.1777(9) 0.6335(6) 0.061(4) Uani 1 1 d U . .

H36A H 0.5770 0.1276 0.6086 0.092 Uiso 1 1 calc R . .

H36B H 0.6348 0.1641 0.6601 0.092 Uiso 1 1 calc R . .

H36C H 0.5988 0.2279 0.6100 0.092 Uiso 1 1 calc R . .

N1B N 0.8737(5) 0.4896(6) 0.7794(4) 0.026(2) Uani 1 1 d U . .

N2B N 0.8378(5) 0.3707(7) 0.6824(4) 0.032(3) Uani 1 1 d U . .

N3B N 0.8408(5) 0.5203(7) 0.6053(4) 0.031(2) Uani 1 1 d U . .

N4B N 0.8690(5) 0.6387(6) 0.7036(4) 0.030(2) Uani 1 1 d U . .

C1B C 0.8901(6) 0.5521(9) 0.8232(5) 0.031(3) Uani 1 1 d U . .

C2B C 0.9102(6) 0.5134(8) 0.8809(5) 0.032(3) Uani 1 1 d U . .

C3B C 0.9025(6) 0.4231(8) 0.8727(5) 0.037(3) Uani 1 1 d U . .

C4B C 0.8797(6) 0.4100(9) 0.8109(5) 0.035(3) Uani 1 1 d U . .

C5B C 0.8673(6) 0.3258(8) 0.7852(5) 0.033(3) Uani 1 1 d U . .

H5BA H 0.8725 0.2773 0.8103 0.040 Uiso 1 1 calc R . .

C6B C 0.8484(6) 0.3089(8) 0.7276(5) 0.030(3) Uani 1 1 d U . .

C7B C 0.8428(6) 0.2204(8) 0.7005(5) 0.033(3) Uani 1 1 d U . .

C8B C 0.8294(6) 0.2301(8) 0.6432(5) 0.034(3) Uani 1 1 d U . .

C9B C 0.8287(6) 0.3255(8) 0.6304(6) 0.035(3) Uani 1 1 d U . .

C10B C 0.8244(6) 0.3641(8) 0.5753(5) 0.031(3) Uani 1 1 d U . .

H10B H 0.8152 0.3262 0.5432 0.037 Uiso 1 1 calc R . .

C11B C 0.8326(6) 0.4555(9) 0.5630(5) 0.035(3) Uani 1 1 d U . .

C12B C 0.8386(6) 0.4891(9) 0.5059(5) 0.037(3) Uani 1 1 d U . .

C13B C 0.8507(6) 0.5785(8) 0.5148(5) 0.034(3) Uani 1 1 d U . .

C14B C 0.8531(6) 0.5964(9) 0.5758(5) 0.032(3) Uani 1 1 d U . .

C15B C 0.8664(6) 0.6761(8) 0.6014(5) 0.037(3) Uani 1 1 d U . .

H15B H 0.8700 0.7233 0.5763 0.045 Uiso 1 1 calc R . .

C16B C 0.8753(7) 0.6965(9) 0.6597(6) 0.039(3) Uani 1 1 d U . .

C17B C 0.8900(6) 0.7857(9) 0.6872(6) 0.040(3) Uani 1 1 d U . .

C18B C 0.8944(6) 0.7769(8) 0.7459(5) 0.037(3) Uani 1 1 d U . .

C19B C 0.8836(6) 0.6814(8) 0.7564(6) 0.033(3) Uani 1 1 d U . .

C20B C 0.8919(6) 0.6439(8) 0.8105(5) 0.032(3) Uani 1 1 d U . .

H20B H 0.8995 0.6824 0.8423 0.038 Uiso 1 1 calc R . .

C21B C 0.9263(6) 0.5636(8) 0.9380(5) 0.038(3) Uani 1 1 d U . .

H21C H 0.9552 0.6152 0.9328 0.046 Uiso 1 1 calc R . .

H21D H 0.9546 0.5260 0.9674 0.046 Uiso 1 1 calc R . .

C22B C 0.8589(6) 0.5935(8) 0.9603(5) 0.052(4) Uani 1 1 d U . .

H22D H 0.8725 0.6248 0.9966 0.078 Uiso 1 1 calc R . .

H22E H 0.8305 0.5426 0.9664 0.078 Uiso 1 1 calc R . .

H22F H 0.8312 0.6320 0.9319 0.078 Uiso 1 1 calc R . .

C23B C 0.9127(6) 0.3524(8) 0.9181(5) 0.045(3) Uani 1 1 d U . .

H23C H 0.9428 0.3747 0.9533 0.054 Uiso 1 1 calc R . .

H23D H 0.9372 0.3024 0.9041 0.054 Uiso 1 1 calc R . .

C24B C 0.8413(7) 0.3215(9) 0.9329(5) 0.059(4) Uani 1 1 d U . .

H24D H 0.8499 0.2769 0.9628 0.089 Uiso 1 1 calc R . .

H24E H 0.8121 0.2972 0.8984 0.089 Uiso 1 1 calc R . .

H24F H 0.8168 0.3709 0.9467 0.089 Uiso 1 1 calc R . .

C25B C 0.8568(6) 0.1347(8) 0.7359(5) 0.035(3) Uani 1 1 d U . .

H25C H 0.8334 0.1386 0.7699 0.042 Uiso 1 1 calc R . .

H25D H 0.8351 0.0856 0.7120 0.042 Uiso 1 1 calc R . .

C26B C 0.9342(6) 0.1158(8) 0.7556(5) 0.044(4) Uani 1 1 d U . .

H26D H 0.9395 0.0616 0.7776 0.066 Uiso 1 1 calc R . .

H26E H 0.9559 0.1636 0.7799 0.066 Uiso 1 1 calc R . .

H26F H 0.9576 0.1101 0.7221 0.066 Uiso 1 1 calc R . .

C27B C 0.8212(6) 0.1600(8) 0.5939(5) 0.037(3) Uani 1 1 d U . .

H27C H 0.7968 0.1082 0.6058 0.044 Uiso 1 1 calc R . .

H27D H 0.7920 0.1840 0.5588 0.044 Uiso 1 1 calc R . .

C28B C 0.8942(6) 0.1336(9) 0.5811(5) 0.053(4) Uani 1 1 d U . .

H28D H 0.8883 0.0898 0.5506 0.080 Uiso 1 1 calc R . .

H28E H 0.9229 0.1094 0.6159 0.080 Uiso 1 1 calc R . .

H28F H 0.9179 0.1848 0.5687 0.080 Uiso 1 1 calc R . .

C29B C 0.8294(6) 0.4392(8) 0.4487(5) 0.042(3) Uani 1 1 d U . .

H29C H 0.8032 0.3847 0.4524 0.050 Uiso 1 1 calc R . .

H29D H 0.8009 0.4747 0.4182 0.050 Uiso 1 1 calc R . .

C30B C 0.9000(7) 0.4174(9) 0.4311(6) 0.072(5) Uani 1 1 d U . .

H30D H 0.8917 0.3850 0.3949 0.108 Uiso 1 1 calc R . .

H30E H 0.9282 0.3820 0.4611 0.108 Uiso 1 1 calc R . .

H30F H 0.9254 0.4713 0.4261 0.108 Uiso 1 1 calc R . .

C31B C 0.8593(6) 0.6471(8) 0.4685(5) 0.044(3) Uani 1 1 d U . .

H31C H 0.8391 0.6236 0.4302 0.053 Uiso 1 1 calc R . .

H31D H 0.8321 0.6997 0.4749 0.053 Uiso 1 1 calc R . .

C32B C 0.9353(6) 0.6722(9) 0.4689(5) 0.053(4) Uani 1 1 d U . .

H32D H 0.9375 0.7157 0.4390 0.080 Uiso 1 1 calc R . .

H32E H 0.9623 0.6207 0.4615 0.080 Uiso 1 1 calc R . .

H32F H 0.9555 0.6965 0.5065 0.080 Uiso 1 1 calc R . .

C33B C 0.9010(7) 0.8697(8) 0.6510(5) 0.052(4) Uani 1 1 d U . .

H33C H 0.9278 0.9144 0.6758 0.062 Uiso 1 1 calc R . .

H33D H 0.9272 0.8550 0.6197 0.062 Uiso 1 1 calc R . .

C34B C 0.8290(5) 0.9015(6) 0.6270(4) 0.070(4) Uani 1 1 d U . .

H34D H 0.8325 0.9538 0.6041 0.105 Uiso 1 1 calc R . .

H34E H 0.8038 0.9153 0.6585 0.105 Uiso 1 1 calc R . .

H34F H 0.8032 0.8564 0.6027 0.105 Uiso 1 1 calc R . .

C35B C 0.9083(5) 0.8482(6) 0.7920(4) 0.038(3) Uani 1 1 d RU . .

H35C H 0.8850 0.8325 0.8247 0.046 Uiso 1 1 calc R . .

H35D H 0.8877 0.9037 0.7758 0.046 Uiso 1 1 calc R . .

C36B C 0.9881(6) 0.8600(8) 0.8133(5) 0.049(4) Uani 1 1 d U . .

H36D H 0.9957 0.9052 0.8429 0.074 Uiso 1 1 calc R . .

H36E H 1.0109 0.8771 0.7811 0.074 Uiso 1 1 calc R . .

H36F H 1.0084 0.8052 0.8295 0.074 Uiso 1 1 calc R . .


loop_

   _atom_site_aniso_label

   _atom_site_aniso_U_11

   _atom_site_aniso_U_22

   _atom_site_aniso_U_33

   _atom_site_aniso_U_23

   _atom_site_aniso_U_13

   _atom_site_aniso_U_12

Zr1 0.0506(10) 0.0118(8) 0.0212(8) 0.0001(7) 0.0040(6) 0.0006(7)

Zr2 0.0518(9) 0.0104(8) 0.0229(8) 0.0001(7) 0.0045(6) -0.0003(7)

Cl1 0.082(3) 0.062(3) 0.085(3) -0.019(3) 0.017(3) 0.000(3)

Cl2 0.087(3) 0.054(3) 0.100(4) 0.026(3) 0.025(3) 0.012(3)

O 0.049(7) 0.156(12) 0.079(8) 0.005(8) 0.026(6) 0.012(7)

N1A 0.034(4) 0.021(4) 0.033(4) 0.003(4) 0.001(3) 0.000(4)

N2A 0.034(4) 0.019(4) 0.025(4) 0.000(3) 0.000(3) 0.006(4)

N3A 0.033(4) 0.021(4) 0.025(4) -0.001(3) 0.000(4) -0.001(4)

N4A 0.039(5) 0.024(4) 0.022(4) 0.001(3) 0.004(3) -0.002(4)

C1A 0.037(5) 0.028(4) 0.026(4) 0.001(4) 0.005(4) -0.001(4)

C2A 0.031(5) 0.028(4) 0.028(4) -0.001(4) 0.005(3) 0.003(4)

C3A 0.034(5) 0.031(4) 0.032(5) 0.001(4) 0.003(4) 0.001(4)

C4A 0.034(5) 0.025(4) 0.025(4) -0.001(4) 0.005(4) 0.001(4)

C5A 0.038(5) 0.026(4) 0.025(4) 0.006(4) 0.002(4) 0.000(4)

C6A 0.036(5) 0.023(4) 0.027(4) 0.001(4) -0.002(4) 0.003(4)

C7A 0.035(5) 0.025(4) 0.030(4) 0.000(3) 0.001(4) 0.002(4)

C8A 0.037(5) 0.026(4) 0.030(4) -0.004(3) 0.001(4) 0.003(4)

C9A 0.033(5) 0.024(4) 0.025(4) 0.000(4) -0.001(4) 0.001(4)

C10A 0.035(5) 0.027(4) 0.030(4) -0.001(4) 0.002(4) -0.002(4)

C11A 0.039(5) 0.031(4) 0.028(4) 0.000(3) 0.004(4) 0.001(4)

C12A 0.036(5) 0.030(4) 0.027(4) -0.001(3) 0.000(4) 0.001(4)

C13A 0.038(5) 0.031(4) 0.028(4) -0.004(3) 0.004(4) 0.000(4)

C14A 0.032(5) 0.025(4) 0.023(4) 0.000(3) 0.000(4) 0.000(4)

C15A 0.030(5) 0.026(4) 0.024(4) 0.001(4) -0.002(4) 0.003(4)

C16A 0.032(5) 0.025(4) 0.024(4) 0.003(4) 0.003(4) -0.004(4)

C17A 0.035(5) 0.026(4) 0.029(4) 0.003(3) 0.004(4) -0.001(4)

C18A 0.037(5) 0.026(4) 0.032(4) 0.001(3) 0.002(4) -0.006(4)

C19A 0.029(5) 0.023(4) 0.023(4) -0.004(4) 0.005(4) 0.002(4)

C20A 0.031(5) 0.026(4) 0.027(4) -0.005(4) -0.001(4) -0.005(4)

C21A 0.038(5) 0.028(5) 0.031(5) 0.004(4) 0.002(4) -0.001(4)

C22A 0.047(5) 0.045(6) 0.054(6) -0.004(4) 0.005(4) -0.002(4)

C23A 0.041(5) 0.031(5) 0.034(5) 0.000(4) 0.004(4) 0.002(4)

C24A 0.045(5) 0.041(5) 0.043(5) 0.007(4) 0.004(4) 0.003(4)

C25A 0.050(5) 0.033(5) 0.041(5) 0.003(4) -0.004(4) 0.001(4)

C26A 0.074(6) 0.053(6) 0.063(6) 0.005(4) 0.015(4) -0.001(4)

C27A 0.042(5) 0.028(5) 0.033(5) 0.001(4) -0.002(4) 0.001(4)

C28A 0.055(5) 0.047(6) 0.052(6) -0.003(4) 0.006(4) -0.005(4)

C29A 0.036(5) 0.025(5) 0.027(4) 0.001(4) 0.002(4) -0.005(4)

C30A 0.051(5) 0.037(5) 0.039(5) -0.003(4) 0.004(4) 0.004(4)

C31A 0.046(5) 0.033(5) 0.032(4) -0.002(4) 0.001(4) 0.005(4)

C32A 0.063(6) 0.055(6) 0.051(6) 0.003(4) 0.010(4) -0.006(4)

C33A 0.041(5) 0.029(5) 0.033(5) 0.002(4) 0.004(4) 0.004(4)

C34A 0.051(5) 0.042(5) 0.049(6) 0.003(4) 0.003(4) 0.005(4)

C35A 0.041(5) 0.023(5) 0.036(5) 0.003(4) 0.001(4) 0.000(4)

C36A 0.069(6) 0.057(6) 0.060(6) -0.004(4) 0.016(4) 0.004(4)

N1B 0.033(4) 0.020(4) 0.027(4) 0.000(3) 0.006(4) 0.000(4)

N2B 0.044(5) 0.026(4) 0.025(4) -0.001(3) 0.007(4) 0.001(4)

N3B 0.040(5) 0.026(4) 0.027(4) -0.001(3) 0.005(4) -0.001(4)

N4B 0.037(5) 0.024(4) 0.029(4) 0.001(3) 0.009(4) -0.006(4)

C1B 0.035(5) 0.029(4) 0.029(4) 0.001(4) 0.005(4) 0.003(4)

C2B 0.032(5) 0.033(4) 0.029(4) 0.001(3) 0.001(4) 0.002(4)

C3B 0.040(5) 0.037(4) 0.033(4) 0.003(3) 0.002(4) -0.004(4)

C4B 0.039(5) 0.032(4) 0.033(4) -0.001(4) 0.005(4) -0.002(4)

C5B 0.044(5) 0.027(4) 0.030(4) 0.005(4) 0.006(4) 0.000(4)

C6B 0.035(5) 0.026(4) 0.028(4) 0.003(3) 0.004(4) 0.000(4)

C7B 0.037(5) 0.030(4) 0.030(4) 0.003(3) 0.005(4) 0.000(4)

C8B 0.039(5) 0.030(4) 0.033(4) 0.002(3) 0.004(4) -0.002(4)

C9B 0.042(5) 0.031(4) 0.033(4) 0.001(3) 0.005(4) 0.001(4)

C10B 0.038(5) 0.028(4) 0.026(4) -0.002(4) 0.003(4) 0.002(4)

C11B 0.042(5) 0.030(4) 0.033(4) 0.002(4) 0.006(4) -0.003(4)

C12B 0.045(5) 0.035(4) 0.032(4) 0.002(3) 0.004(4) -0.002(4)

C13B 0.039(5) 0.033(4) 0.029(4) 0.003(3) 0.004(4) 0.001(4)

C14B 0.035(5) 0.030(4) 0.031(4) 0.000(3) 0.007(4) -0.002(4)

C15B 0.044(5) 0.033(5) 0.034(4) 0.003(4) 0.003(4) 0.001(4)

C16B 0.048(5) 0.034(5) 0.035(4) 0.001(4) 0.005(4) -0.003(4)

C17B 0.047(5) 0.034(4) 0.037(4) -0.001(3) 0.004(4) -0.006(4)

C18B 0.044(5) 0.028(4) 0.036(4) -0.003(3) 0.005(4) -0.001(4)

C19B 0.039(5) 0.027(4) 0.031(4) 0.000(4) 0.002(4) -0.001(4)

C20B 0.039(5) 0.028(4) 0.027(4) -0.004(4) 0.004(4) 0.000(4)

C21B 0.045(5) 0.032(5) 0.034(4) 0.006(4) -0.004(4) -0.002(4)

C22B 0.057(6) 0.050(6) 0.050(5) -0.005(4) 0.012(4) -0.001(4)

C23B 0.052(5) 0.039(5) 0.041(5) 0.001(4) 0.002(4) 0.003(4)

C24B 0.068(6) 0.056(6) 0.055(6) 0.005(4) 0.014(4) -0.006(4)

C25B 0.041(5) 0.028(5) 0.034(5) 0.003(4) 0.006(4) 0.000(4)

C26B 0.048(5) 0.037(5) 0.047(5) 0.006(4) 0.007(4) 0.005(4)

C27B 0.045(5) 0.030(5) 0.035(5) 0.002(4) 0.004(4) -0.003(4)

C28B 0.058(5) 0.050(6) 0.053(6) -0.006(4) 0.010(4) 0.003(4)

C29B 0.048(5) 0.037(5) 0.037(5) -0.002(4) 0.001(4) 0.001(4)

C30B 0.073(6) 0.074(6) 0.071(6) -0.009(4) 0.018(5) 0.001(4)

C31B 0.053(5) 0.040(5) 0.040(5) 0.004(4) 0.007(4) -0.002(4)

C32B 0.059(5) 0.051(6) 0.051(6) 0.005(4) 0.011(4) -0.003(4)

C33B 0.060(5) 0.042(5) 0.050(5) 0.002(4) 0.002(4) -0.005(4)

C34B 0.076(6) 0.063(6) 0.070(6) 0.005(4) 0.012(4) 0.001(4)

C35B 0.044(5) 0.032(5) 0.037(5) -0.001(4) 0.004(4) -0.005(4)

C36B 0.050(5) 0.045(6) 0.053(5) -0.005(4) 0.006(4) 0.001(4)


_geom_special_details

;

   All esds (except the esd in the dihedral angle between two l.s. planes)

   are estimated using the full covariance matrix.  The cell esds are taken

   into account individually in the estimation of esds in distances, angles

   and torsion angles; correlations between esds in cell parameters are only

   used when they are defined by crystal symmetry.  An approximate (isotropic)

   treatment of cell esds is used for estimating esds involving l.s. planes.

;


loop_

   _geom_bond_atom_site_label_1

   _geom_bond_atom_site_label_2

   _geom_bond_distance

   _geom_bond_site_symmetry_2

   _geom_bond_publ_flag

Zr1 O 1.900(9) . ?

Zr1 N4A 2.252(9) . ?

Zr1 N3A 2.257(9) . ?

Zr1 N1A 2.264(9) . ?

Zr1 N2A 2.263(9) . ?

Zr1 Cl2 2.694(4) . ?

Zr1 Cl1 2.777(4) . ?

Zr1 Zr2 3.3171(19) . ?

Zr2 O 1.891(9) . ?

Zr2 N1B 2.237(9) . ?

Zr2 N4B 2.273(10) . ?

Zr2 N3B 2.300(9) . ?

Zr2 N2B 2.289(10) . ?

Zr2 Cl1 2.634(4) . ?

Zr2 Cl2 2.734(4) . ?

N1A C1A 1.383(13) . ?

N1A C4A 1.393(13) . ?

N2A C6A 1.366(13) . ?

N2A C9A 1.376(13) . ?

N3A C14A 1.372(13) . ?

N3A C11A 1.397(13) . ?

N4A C19A 1.380(13) . ?

N4A C16A 1.413(13) . ?

C1A C20A 1.396(15) . ?

C1A C2A 1.441(14) . ?

C2A C3A 1.379(15) . ?

C2A C21A 1.479(14) . ?

C3A C4A 1.440(15) . ?

C3A C23A 1.512(15) . ?

C4A C5A 1.383(15) . ?

C5A C6A 1.363(14) . ?

C6A C7A 1.472(15) . ?

C7A C8A 1.335(14) . ?

C7A C25A 1.527(15) . ?

C8A C9A 1.458(15) . ?

C8A C27A 1.518(14) . ?

C9A C10A 1.352(14) . ?

C10A C11A 1.428(15) . ?

C11A C12A 1.433(14) . ?

C12A C13A 1.357(15) . ?

C12A C29A 1.533(15) . ?

C13A C14A 1.457(14) . ?

C13A C31A 1.491(15) . ?

C14A C15A 1.379(14) . ?

C15A C16A 1.344(14) . ?

C16A C17A 1.463(15) . ?

C17A C18A 1.342(14) . ?

C17A C33A 1.509(14) . ?

C18A C19A 1.476(15) . ?

C18A C35A 1.512(15) . ?

C19A C20A 1.345(14) . ?

C21A C22A 1.502(14) . ?

C23A C24A 1.483(13) . ?

C25A C26A 1.509(14) . ?

C27A C28A 1.471(14) . ?

C29A C30A 1.515(13) . ?

C31A C32A 1.529(14) . ?

C33A C34A 1.453(13) . ?

C35A C36A 1.482(14) . ?

N1B C1B 1.380(13) . ?

N1B C4B 1.400(13) . ?

N2B C9B 1.369(13) . ?

N2B C6B 1.390(13) . ?

N3B C11B 1.375(13) . ?

N3B C14B 1.377(13) . ?

N4B C19B 1.367(14) . ?

N4B C16B 1.361(14) . ?

C1B C20B 1.418(15) . ?

C1B C2B 1.447(15) . ?

C2B C3B 1.380(15) . ?

C2B C21B 1.508(15) . ?

C3B C4B 1.435(15) . ?

C3B C23B 1.488(15) . ?

C4B C5B 1.404(15) . ?

C5B C6B 1.345(14) . ?

C6B C7B 1.470(15) . ?

C7B C8B 1.317(14) . ?

C7B C25B 1.529(15) . ?

C8B C9B 1.469(15) . ?

C8B C27B 1.543(15) . ?

C9B C10B 1.394(14) . ?

C10B C11B 1.421(15) . ?

C11B C12B 1.439(15) . ?

C12B C13B 1.377(15) . ?

C12B C29B 1.508(15) . ?

C13B C14B 1.432(15) . ?

C13B C31B 1.519(15) . ?

C14B C15B 1.345(15) . ?

C15B C16B 1.366(15) . ?

C16B C17B 1.494(16) . ?

C17B C18B 1.353(15) . ?

C17B C33B 1.553(16) . ?

C18B C19B 1.480(15) . ?

C18B C35B 1.507(14) . ?

C19B C20B 1.359(14) . ?

C21B C22B 1.519(14) . ?

C23B C24B 1.516(14) . ?

C25B C26B 1.479(13) . ?

C27B C28B 1.511(14) . ?

C29B C30B 1.493(14) . ?

C31B C32B 1.480(14) . ?

C33B C34B 1.455(13) . ?

C35B C36B 1.509(12) . ?


loop_

   _geom_angle_atom_site_label_1

   _geom_angle_atom_site_label_2

   _geom_angle_atom_site_label_3

   _geom_angle

   _geom_angle_site_symmetry_1

   _geom_angle_site_symmetry_3

   _geom_angle_publ_flag

O Zr1 N4A 105.9(4) . . ?

O Zr1 N3A 82.0(4) . . ?

N4A Zr1 N3A 78.3(3) . . ?

O Zr1 N1A 152.1(4) . . ?

N4A Zr1 N1A 78.4(3) . . ?

N3A Zr1 N1A 125.5(3) . . ?

O Zr1 N2A 115.8(4) . . ?

N4A Zr1 N2A 127.8(3) . . ?

N3A Zr1 N2A 78.0(3) . . ?

N1A Zr1 N2A 78.8(3) . . ?

O Zr1 Cl2 74.6(3) . . ?

N4A Zr1 Cl2 144.9(3) . . ?

N3A Zr1 Cl2 135.0(3) . . ?

N1A Zr1 Cl2 86.2(3) . . ?

N2A Zr1 Cl2 78.5(2) . . ?

O Zr1 Cl1 73.3(3) . . ?

N4A Zr1 Cl1 79.1(2) . . ?

N3A Zr1 Cl1 140.2(3) . . ?

N1A Zr1 Cl1 80.7(3) . . ?

N2A Zr1 Cl1 140.9(3) . . ?

Cl2 Zr1 Cl1 67.24(13) . . ?

O Zr1 Zr2 28.9(3) . . ?

N4A Zr1 Zr2 111.7(2) . . ?

N3A Zr1 Zr2 110.8(2) . . ?

N1A Zr1 Zr2 123.5(2) . . ?

N2A Zr1 Zr2 120.1(2) . . ?

Cl2 Zr1 Zr2 52.88(9) . . ?

Cl1 Zr1 Zr2 50.26(9) . . ?

O Zr2 N1B 80.6(4) . . ?

O Zr2 N4B 104.5(4) . . ?

N1B Zr2 N4B 78.2(3) . . ?

O Zr2 N3B 155.1(4) . . ?

N1B Zr2 N3B 123.6(3) . . ?

N4B Zr2 N3B 77.7(3) . . ?

O Zr2 N2B 116.4(4) . . ?

N1B Zr2 N2B 78.4(3) . . ?

N4B Zr2 N2B 128.1(3) . . ?

N3B Zr2 N2B 77.9(3) . . ?

O Zr2 Cl1 77.1(3) . . ?

N1B Zr2 Cl1 135.4(3) . . ?

N4B Zr2 Cl1 144.7(3) . . ?

N3B Zr2 Cl1 87.0(2) . . ?

N2B Zr2 Cl1 77.8(3) . . ?

O Zr2 Cl2 73.7(3) . . ?

N1B Zr2 Cl2 138.8(3) . . ?

N4B Zr2 Cl2 77.9(3) . . ?

N3B Zr2 Cl2 82.8(2) . . ?

N2B Zr2 Cl2 142.0(3) . . ?

Cl1 Zr2 Cl2 68.69(14) . . ?

O Zr2 Zr1 29.0(3) . . ?

N1B Zr2 Zr1 109.5(2) . . ?

N4B Zr2 Zr1 112.0(2) . . ?

N3B Zr2 Zr1 126.7(2) . . ?

N2B Zr2 Zr1 119.4(2) . . ?

Cl1 Zr2 Zr1 54.16(9) . . ?

Cl2 Zr2 Zr1 51.78(9) . . ?

Zr2 Cl1 Zr1 75.58(11) . . ?

Zr1 Cl2 Zr2 75.34(11) . . ?

Zr2 O Zr1 122.1(5) . . ?

C1A N1A C4A 103.9(9) . . ?

C1A N1A Zr1 128.1(8) . . ?

C4A N1A Zr1 126.1(8) . . ?

C6A N2A C9A 107.1(10) . . ?

C6A N2A Zr1 123.3(8) . . ?

C9A N2A Zr1 123.6(8) . . ?

C14A N3A C11A 103.9(9) . . ?

C14A N3A Zr1 125.8(8) . . ?

C11A N3A Zr1 126.8(8) . . ?

C19A N4A C16A 108.5(10) . . ?

C19A N4A Zr1 123.0(8) . . ?

C16A N4A Zr1 120.6(7) . . ?

N1A C1A C20A 121.8(11) . . ?

N1A C1A C2A 112.5(11) . . ?

C20A C1A C2A 125.7(12) . . ?

C3A C2A C1A 105.2(11) . . ?

C3A C2A C21A 128.1(12) . . ?

C1A C2A C21A 126.7(12) . . ?

C2A C3A C4A 107.4(11) . . ?

C2A C3A C23A 125.7(12) . . ?

C4A C3A C23A 126.9(12) . . ?

C5A C4A N1A 122.7(11) . . ?

C5A C4A C3A 126.2(12) . . ?

N1A C4A C3A 110.9(11) . . ?

C6A C5A C4A 128.5(12) . . ?

C5A C6A N2A 125.0(12) . . ?

C5A C6A C7A 125.8(12) . . ?

N2A C6A C7A 109.1(11) . . ?

C8A C7A C6A 107.0(11) . . ?

C8A C7A C25A 127.6(12) . . ?

C6A C7A C25A 125.2(11) . . ?

C7A C8A C9A 107.5(11) . . ?

C7A C8A C27A 127.7(12) . . ?

C9A C8A C27A 124.7(11) . . ?

C10A C9A N2A 126.3(12) . . ?

C10A C9A C8A 124.5(12) . . ?

N2A C9A C8A 109.1(10) . . ?

C9A C10A C11A 125.7(12) . . ?

N3A C11A C10A 123.1(11) . . ?

N3A C11A C12A 111.1(11) . . ?

C10A C11A C12A 125.7(12) . . ?

C13A C12A C11A 107.4(11) . . ?

C13A C12A C29A 126.8(11) . . ?

C11A C12A C29A 125.2(12) . . ?

C12A C13A C14A 105.7(11) . . ?

C12A C13A C31A 129.5(12) . . ?

C14A C13A C31A 124.7(12) . . ?

N3A C14A C15A 123.6(11) . . ?

N3A C14A C13A 111.8(11) . . ?

C15A C14A C13A 124.5(12) . . ?

C16A C15A C14A 127.9(12) . . ?

C15A C16A N4A 124.2(12) . . ?

C15A C16A C17A 128.8(12) . . ?

N4A C16A C17A 106.9(10) . . ?

C18A C17A C16A 108.8(11) . . ?

C18A C17A C33A 128.3(12) . . ?

C16A C17A C33A 122.9(11) . . ?

C17A C18A C19A 107.8(11) . . ?

C17A C18A C35A 128.9(12) . . ?

C19A C18A C35A 123.0(11) . . ?

C20A C19A N4A 125.2(12) . . ?

C20A C19A C18A 126.9(12) . . ?

N4A C19A C18A 107.8(10) . . ?

C19A C20A C1A 128.3(12) . . ?

C2A C21A C22A 113.6(10) . . ?

C24A C23A C3A 113.3(10) . . ?

C26A C25A C7A 110.2(11) . . ?

C28A C27A C8A 113.0(10) . . ?

C30A C29A C12A 113.4(10) . . ?

C13A C31A C32A 113.2(10) . . ?

C34A C33A C17A 112.0(10) . . ?

C36A C35A C18A 110.3(10) . . ?

C1B N1B C4B 102.4(9) . . ?

C1B N1B Zr2 124.6(8) . . ?

C4B N1B Zr2 125.6(8) . . ?

C9B N2B C6B 107.9(10) . . ?

C9B N2B Zr2 125.0(8) . . ?

C6B N2B Zr2 123.5(8) . . ?

C11B N3B C14B 104.3(10) . . ?

C11B N3B Zr2 126.1(8) . . ?

C14B N3B Zr2 126.1(8) . . ?

C19B N4B C16B 109.6(11) . . ?

C19B N4B Zr2 120.4(8) . . ?

C16B N4B Zr2 125.3(8) . . ?

N1B C1B C20B 121.6(11) . . ?

N1B C1B C2B 113.1(11) . . ?

C20B C1B C2B 125.1(12) . . ?

C3B C2B C1B 105.5(11) . . ?

C3B C2B C21B 128.0(11) . . ?

C1B C2B C21B 126.1(12) . . ?

C2B C3B C4B 106.2(11) . . ?

C2B C3B C23B 127.8(12) . . ?

C4B C3B C23B 125.9(12) . . ?

C5B C4B N1B 124.2(11) . . ?

C5B C4B C3B 123.1(12) . . ?

N1B C4B C3B 112.7(11) . . ?

C6B C5B C4B 126.1(12) . . ?

C5B C6B N2B 126.7(12) . . ?

C5B C6B C7B 125.6(12) . . ?

N2B C6B C7B 107.4(10) . . ?

C8B C7B C6B 108.5(11) . . ?

C8B C7B C25B 128.3(12) . . ?

C6B C7B C25B 123.1(11) . . ?

C7B C8B C9B 107.7(12) . . ?

C7B C8B C27B 130.3(12) . . ?

C9B C8B C27B 121.8(11) . . ?

N2B C9B C10B 125.2(12) . . ?

N2B C9B C8B 108.4(11) . . ?

C10B C9B C8B 126.2(12) . . ?

C9B C10B C11B 126.7(12) . . ?

N3B C11B C10B 123.3(11) . . ?

N3B C11B C12B 112.8(11) . . ?

C10B C11B C12B 123.7(12) . . ?

C13B C12B C11B 104.2(11) . . ?

C13B C12B C29B 127.7(11) . . ?

C11B C12B C29B 128.0(12) . . ?

C12B C13B C14B 108.0(11) . . ?

C12B C13B C31B 126.6(11) . . ?

C14B C13B C31B 125.4(12) . . ?

C15B C14B N3B 124.1(12) . . ?

C15B C14B C13B 125.1(12) . . ?

N3B C14B C13B 110.7(11) . . ?

C14B C15B C16B 128.2(13) . . ?

C15B C16B N4B 125.6(13) . . ?

C15B C16B C17B 127.3(13) . . ?

N4B C16B C17B 107.0(11) . . ?

C18B C17B C16B 108.3(12) . . ?

C18B C17B C33B 129.3(12) . . ?

C16B C17B C33B 122.4(11) . . ?

C17B C18B C19B 106.0(11) . . ?

C17B C18B C35B 127.9(12) . . ?

C19B C18B C35B 126.2(11) . . ?

C20B C19B N4B 127.0(12) . . ?

C20B C19B C18B 124.0(12) . . ?

N4B C19B C18B 108.9(11) . . ?

C19B C20B C1B 126.5(12) . . ?

C2B C21B C22B 113.2(10) . . ?

C3B C23B C24B 111.7(10) . . ?

C26B C25B C7B 113.4(10) . . ?

C28B C27B C8B 110.4(10) . . ?

C30B C29B C12B 112.2(10) . . ?

C32B C31B C13B 113.1(10) . . ?

C34B C33B C17B 105.8(10) . . ?

C18B C35B C36B 110.9(9) . . ?


_diffrn_measured_fraction_theta_max    0.998

_diffrn_reflns_theta_full              19.78

_diffrn_measured_fraction_theta_full   0.998

_refine_diff_density_max    0.818

_refine_diff_density_min   -0.744

_refine_diff_density_rms    0.095


#===END
